# Supplementary material
Source: PubMed Central journal article supplement (PMC10992495)

**Supplementary Table 1: Primer sequence of RT-qPCR**

---

| Gene Name      | Primer Sequence (5'-3')                                                                 |
|----------------|-----------------------------------------------------------------------------------------|
| miR-135b-5p    | F:ACACTCCAGCTGGGTATGGCTTTTCATTCCT<br>R:CTCAACTGGTGTCGTGGAGTCGGCAATTCAGTTG<br>AGTCACATAG |
| miR-16         | F:ACACTCCAGCTGGGTAGCAGCACGTAAATA<br>R:CTCAACTGGTGTCGTGGAGTCGGCAATTCAGTTG<br>AGCGCCAATA  |
| U6             | F:CTCGCTTCGGCAGCACA<br>R:AACGCTTCACGAATTTGCGT                                           |
| $\beta$ -actin | F: CATGTACGTTGCTATCCAGGC<br>R: CTCCTTAATGTCACGCACGAT                                    |
| T-bet          | F: GGTGCGGAGACATGCTGA<br>R: GTAGGCGTAGGCTCCAAGG                                         |

---

**Supplementary Table 2: miR-135b-5p target genes related to apoptosis and**

**IFN- $\gamma$**

---

Gene Name

---

ARNT

ESRRA

BCL2L2

HOXA10

TGFBR1

IRS2

HMBOX1

STAT6

SPATA2

NR3C2

KDM5B

SMAD2

RORA

INHBA

SP1

PIK3R2

CASZ1

RPS6KB1

---

## Supplementary Figure legends

**Supplementary Fig.1. GW4869 inhibited the secretion of exosomes. (a)** The concentration of exosomes from CM of MGC803 cells pretreated by PBS, DMSO or GW4869 was measured by BCA. Values are expressed as means  $\pm$  SD. Data are representative of results from 3 independent experiments. \*\*\* $p < 0.001$ .

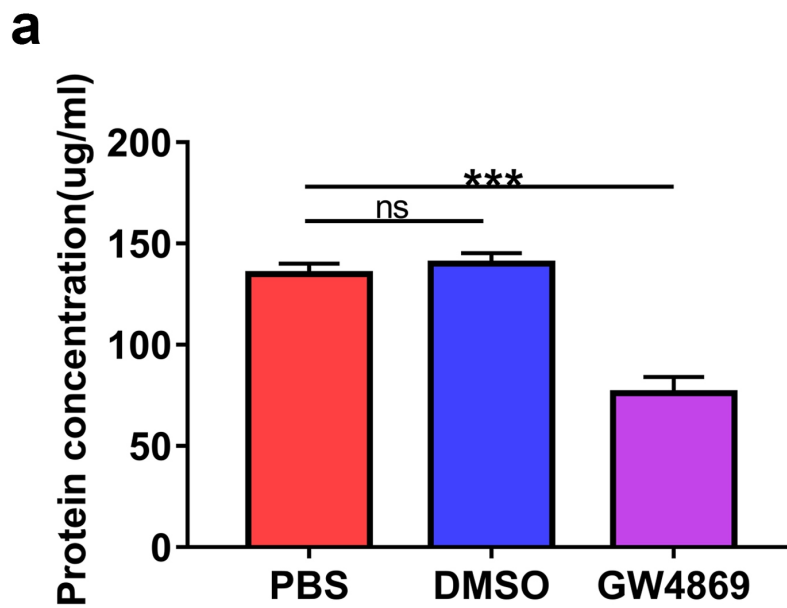

**Supplementary Fig.2. GC cell-derived exosomes regulated the function of V $\gamma$ 9V $\delta$ 2 T cells. (a)** The cell viability of V $\gamma$ 9V $\delta$ 2 T cells treated with exosomes from GES-1 (GES-1 EXO) or MKN45 (MKN45 EXO) cells was analyzed by CCK-8 assay. **(b, c)** The apoptosis rate **(b)** and the IFN- $\gamma$  and TNF- $\alpha$  production **(c)** of V $\gamma$ 9V $\delta$ 2 T cells treated with exosomes from GES-1 (GES-1 EXO) or MKN45 (MKN45 EXO) cells were detected by flow cytometry. Values are expressed as means  $\pm$  SD. Data are representative of results from 3 independent experiments. \*\*p < 0.01, \*\*\*p < 0.001.

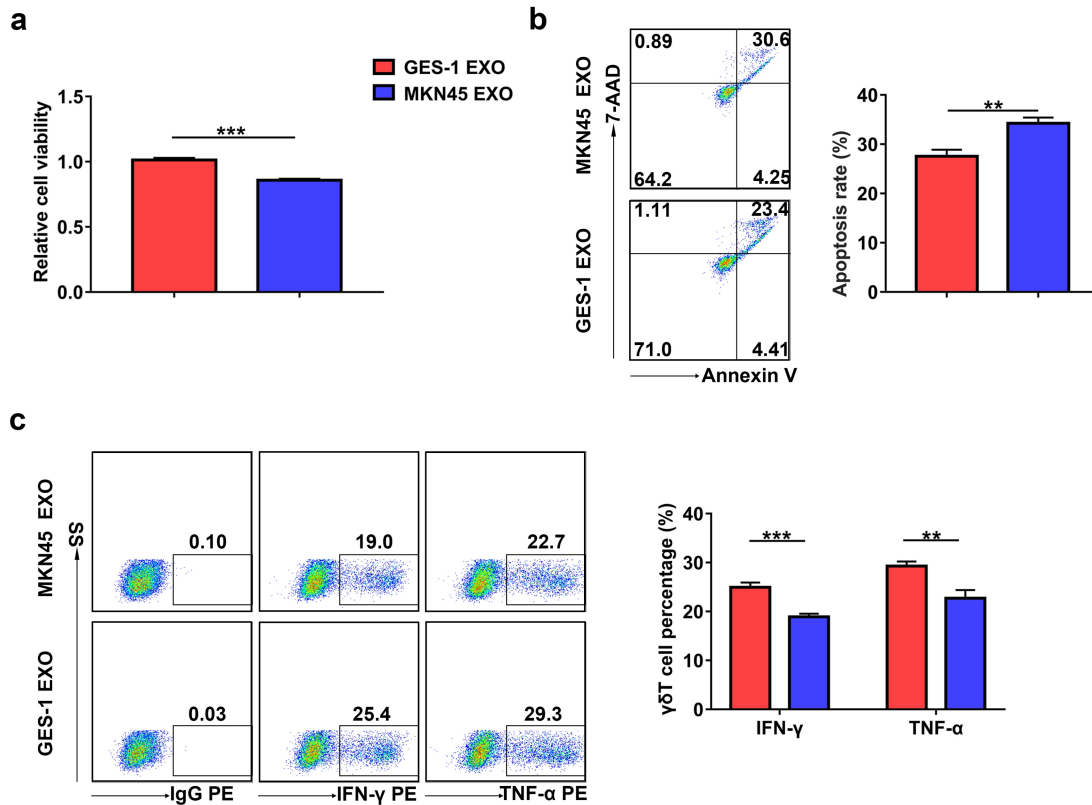

### Supplementary Fig.3. Establishment of stable miR-135b-5p knockdown GC cell

lines. (a) MGC803 and MKN45 cells transfected with the lentivirus-packaged miR-135b-5p inhibitor (LV-miR-135b-IN) or control RNA inhibitor (LV-NC) were observed under a fluorescence microscope. (b) The expression of miR-135b-5p in MGC803 and MKN45 cells infected with LV-miR-135b-IN or LV-NC was analyzed by RT-qPCR. (c) The expression of miR-135b-5p in exosomes from MGC803 and MKN45 cells infected with LV-miR-135b-IN or LV-NC was analyzed by RT-qPCR. Values are expressed as means  $\pm$  SD. Data are representative of results from 3 independent experiments. \*\* $p < 0.01$ , \*\*\* $p < 0.001$ .

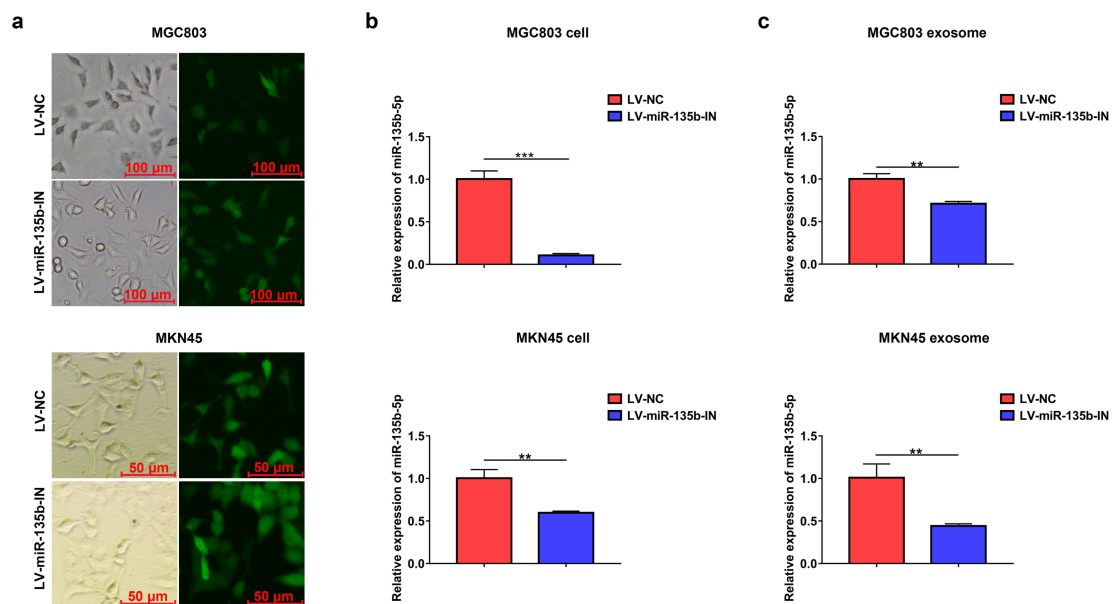

**Supplementary Fig.4. SP1 is related to V $\gamma$ 9V $\delta$ 2 T cell apoptosis and T-bet expression. (a)** The mRNA expression of T-bet in V $\gamma$ 9V $\delta$ 2 T cells treated with Plicamycin was analyzed by RT-qPCR. **(b)** The apoptosis rate of V $\gamma$ 9V $\delta$ 2 T cells treated with Plicamycin was detected by flow cytometry. Values are expressed as means  $\pm$  SD. Data are representative of results from 3 independent experiments. \*\*p < 0.01, \*\*\*p < 0.001.

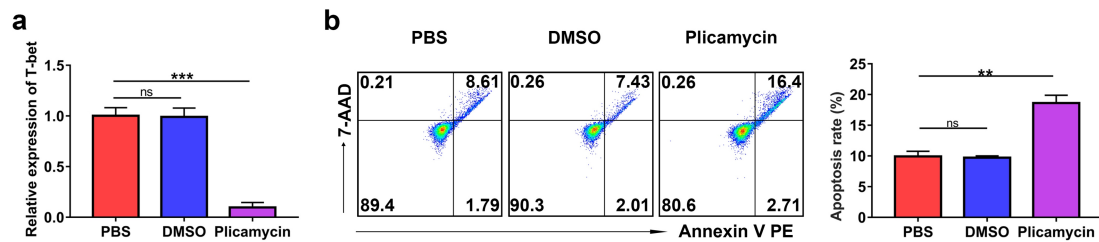

**Supplementary Fig.5. GC cell-derived CM induced apoptosis of CD4+ T cells and CD8+ T cells. (a, b)** The apoptosis rate of CD4+ T cells (a) and CD8+ T cells (b) treated with CM from GES-1 cells (GES-1 CM), MGC803 cells (MGC803 CM) or MKN45 cells (MKN45 CM) was detected by flow cytometry. Values are expressed as means  $\pm$  SD. Data are representative of results from 3 independent experiments. \* $p$  <0.05, \*\* $p$  <0.01, \*\*\* $p$  <0.001.

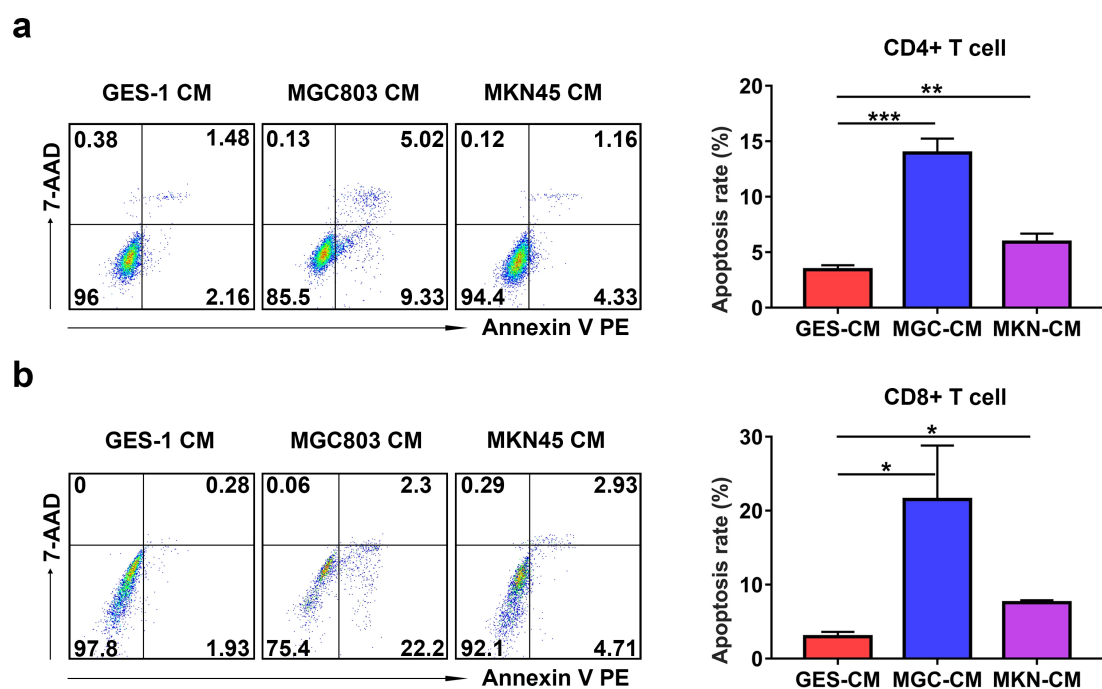

Supplement: 262_2021_2991_MOESM1_ESM.pdf [file 262_2021_2991_MOESM1_ESM.pdf]
